# Supplementary material
Source: PubMed Central journal article supplement (PMC3100599)

# Supplemental Fig. I

**A**

a) *mouse C/ebp $\alpha$  TRE: 5'*  $\overleftarrow{\hspace{1.5cm}}$  GCCGTGGGGTTCGCGTGGAGTTCAGA  $\overrightarrow{\hspace{1.5cm}}$  3' (-608/-583)

*rat C/ebp $\alpha$  TRE: 5'* GTAGTGGGGTTCGCCTGGAGTTCAGA 3' (-611/-586)

b)

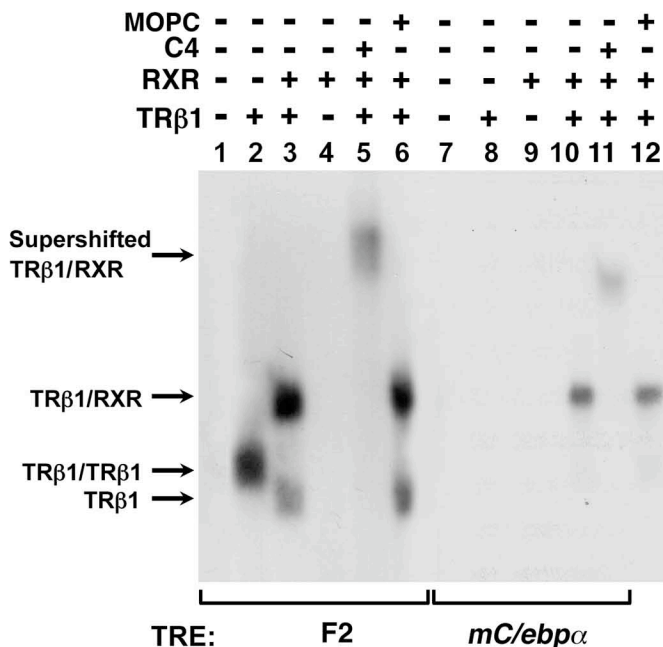

**B**

a) *mouse C/ebp $\alpha$  TRE: 5'*  $\overleftarrow{\hspace{1.5cm}}$  GCCGTGGGGTTCGCGTGGAGTTCAGA  $\overrightarrow{\hspace{1.5cm}}$  3' (-608/-583)

*mC/ebp $\alpha$  Mut 1: 5'*  $\overleftarrow{\hspace{1.5cm}}$  GCCGTGGGATACGCGTGGAGTTCAGA  $\overrightarrow{\hspace{1.5cm}}$  3' (-608/-583)  
 \*\*\*

*mC/ebp $\alpha$  Mut 2: 5'*  $\overleftarrow{\hspace{1.5cm}}$  GCCGTGGGGTTCGCGTGGACATGAGA  $\overrightarrow{\hspace{1.5cm}}$  3' (-608/-583)  
 \*\*\*\*

b)

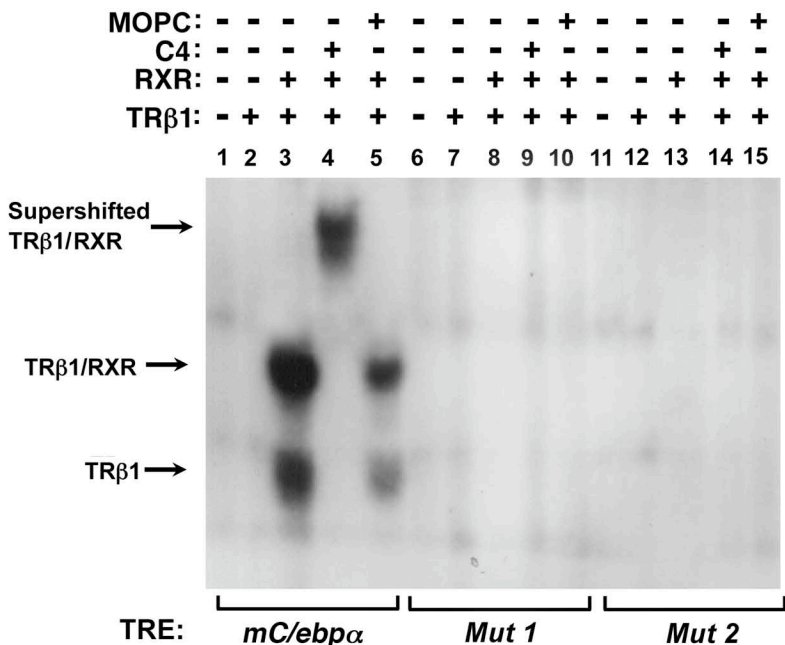

Supplement: supp_me.2010-0474_me-10-0474_Suppl_Fig_I.pdf [file supp_me.2010-0474_me-10-0474_Suppl_Fig_I.pdf]
